# Supplementary material for: Core–shell ZnSe–CdSe quantum dots: a facile approach via decomposition of cyclohexeno-1,2,3-selenadiazole
Source: Royal Society of Chemistry journal article supplement (doi:10.1039/c4ra00676c), 2014-01-01
Supplement: c4ra00676c1.pdf [file c4ra00676c1.pdf]

## Supporting Information

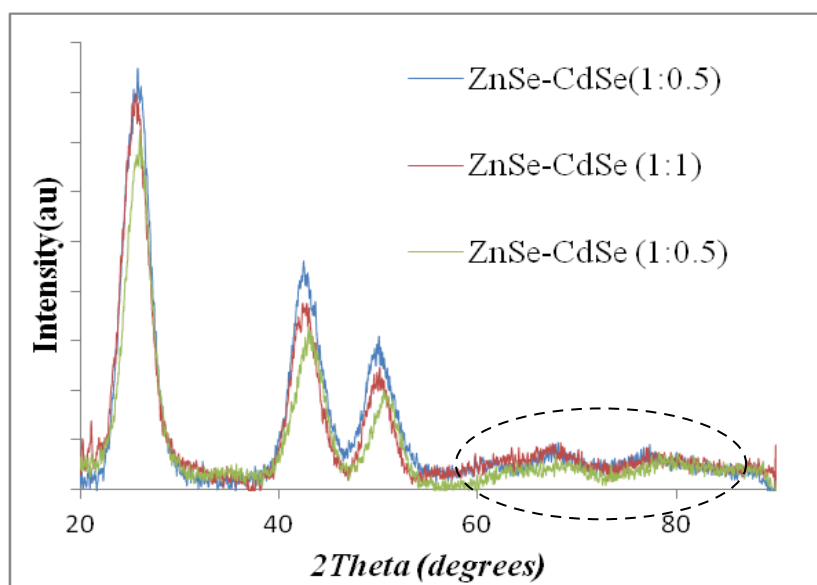

**ESI. Figure 1:** XRD spectra of the various as-synthesized ZnSe-CdSe core-shell QDs, The highlighted area shows peaks beyond  $2\theta$  value of  $60^\circ$  often indicates well crystalline nature of the sample.

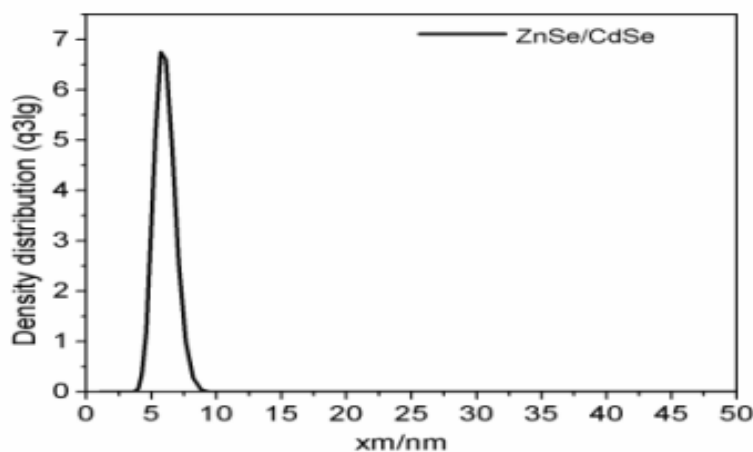

**ESI. Figure 2:** The particle size distribution data of the the core-shell QDs synthesized with the ratio of (1:1.15) obtained from dyanamic laser scattering technique by an action of Laser scattering of wavelength 632 nm revealed that the tiny core-shell nanostructures were narrowly distributed within 2-6 nm
